# Supplementary material for: Psychobiotics: Mechanisms of Action, Evaluation Methods and Effectiveness in Applications with Food Products
Source: PubMed Central journal article supplement (PMC7767237; doi:10.3390/nu12123896), 2020-12-19
Supplement: nutrients-12-03896-s001.pdf [file nutrients-12-03896-s001.pdf]

**Table S1.** Studies applying different tests to evaluate the psychobiotic potential of a strain, formulation or food product.

| Type of study               | Experimental subject                                                                                                                                 | Type of test               | Test                                  | References*                                                                                                                                                                                                                                                                                                                                         |
|-----------------------------|------------------------------------------------------------------------------------------------------------------------------------------------------|----------------------------|---------------------------------------|-----------------------------------------------------------------------------------------------------------------------------------------------------------------------------------------------------------------------------------------------------------------------------------------------------------------------------------------------------|
| Preclinical                 | Rats or mice                                                                                                                                         | Behavioral                 | Stress-induced hyperthermia           | (Savignac, Kiely, Dinan, & Cryan, 2014; Bravo <i>et al.</i> , 2011; van de Wou <i>et al.</i> , 2020)                                                                                                                                                                                                                                                |
|                             |                                                                                                                                                      |                            | Elevated plus maze                    | (Savignac, Kiely, Dinan, & Cryan, 2014; Hao, Wang, Guo, & Liu, 2019; Luo <i>et al.</i> , 2014; Morshedi <i>et al.</i> , 2018; Liu <i>et al.</i> , 2015; Bravo <i>et al.</i> , 2011; Tian, Wang, Zhao, Zhang, & Chen, 2019; Leclercq <i>et al.</i> , 2017; van de Wou <i>et al.</i> , 2020)                                                          |
|                             |                                                                                                                                                      |                            | Open field                            | (Savignac, Kiely, Dinan, & Cryan, 2014; Hao, Wang, Guo, & Liu, 2019; Liu <i>et al.</i> , 2015; Kantak, Bobrow, & Nyby, 2014; Tian, Wang, Zhao, Zhang, & Chen, 2019; Leclercq <i>et al.</i> , 2017; van de Wou <i>et al.</i> , 2020)                                                                                                                 |
|                             |                                                                                                                                                      |                            | Forced swim test                      | (Savignac, Kiely, Dinan, & Cryan, 2014; Desbonnet <i>et al.</i> , 2010; Hao, Wang, Guo, & Liu, 2019; Morshedi <i>et al.</i> , 2018; Liu <i>et al.</i> , 2015; Tian, Wang, Zhao, Zhang, & Chen, 2019; Yunes <i>et al.</i> , 2019; van de Wou <i>et al.</i> , 2020; Ko, Lin and Tsai, 2013; Bravo <i>et al.</i> , 2011; Ko, Lin, & Tsai, 2013)        |
|                             |                                                                                                                                                      | Biologic studies           | Sucrose preference test               | (Liu <i>et al.</i> , 2015; Tian, Wang, Zhao, Zhang, & Chen, 2019; van de Wou <i>et al.</i> , 2020)                                                                                                                                                                                                                                                  |
|                             |                                                                                                                                                      |                            | Corticosterone levels                 | (Savignac, Kiely, Dinan, & Cryan, 2014; Tian <i>et al.</i> , 2020; Hao, Wang, Guo, & Liu, 2019; Morshedi <i>et al.</i> , 2018; Takada <i>et al.</i> , 2016; Liu <i>et al.</i> , 2015; Bravo <i>et al.</i> , 2011; Desbonnet <i>et al.</i> , 2010; Ait-Belgnaoui <i>et al.</i> , 2014; Takada <i>et al.</i> , 2016; van de Wou <i>et al.</i> , 2020) |
|                             | In vitro                                                                                                                                             | Bacterial Mammal cell line | Cytokines level                       | (Leclercq <i>et al.</i> , 2017; Tian <i>et al.</i> , 2020; Desbonnet <i>et al.</i> , 2010; Hao, Wang, Guo, & Liu, 2019; Luo <i>et al.</i> , 2014; Musa <i>et al.</i> , 2017; van de Wou <i>et al.</i> , 2020)                                                                                                                                       |
|                             |                                                                                                                                                      |                            | SCFAs content                         | (Tian <i>et al.</i> , 2020; Hao, Wang, Guo, & Liu, 2019; Tian, Wang, Zhao, Zhang, & Chen, 2019; van de Wou <i>et al.</i> , 2020)                                                                                                                                                                                                                    |
|                             |                                                                                                                                                      |                            | Serotonin levels                      | (Yano <i>et al.</i> , 2015; Clarke <i>et al.</i> , 2012; Tian <i>et al.</i> , 2020; Desbonnet <i>et al.</i> , 2010; Luo <i>et al.</i> , 2014; ).                                                                                                                                                                                                    |
|                             |                                                                                                                                                      |                            | GABA production                       | (Siragusa <i>et al.</i> , 2007; Valenzuela <i>et al.</i> , 2019; Yunes <i>et al.</i> , 2016; Cataldo <i>et al.</i> , 2020; Ko, Lin, & Tsai, 2013)                                                                                                                                                                                                   |
| Clinical                    | Humans                                                                                                                                               | Behavioral                 | Serotonin production                  | (Tian <i>et al.</i> , 2020; Tian, Wang, Zhao, Zhang, & Chen, 2019; Musa <i>et al.</i> , 2017)                                                                                                                                                                                                                                                       |
|                             |                                                                                                                                                      |                            | Hospital Anxiety and Depression scale | (Pinto-Sanchez <i>et al.</i> , 2017; Kato-Kataoka <i>et al.</i> , 2016; Nishida <i>et al.</i> , 2017; Messaoudi <i>et al.</i> , 2010; Butler <i>et al.</i> , 2020)                                                                                                                                                                                  |
|                             |                                                                                                                                                      |                            | General Health Questionnaire          | (Nishida <i>et al.</i> , 2017; Kouchaki <i>et al.</i> , 2017; Nishihira <i>et al.</i> , 2014; Mohammadi <i>et al.</i> , 2015)                                                                                                                                                                                                                       |
|                             |                                                                                                                                                      |                            | Perceived stress scale                | (Allen <i>et al.</i> , 2016; Adikari, Appukutty, & Kuan, 2019; Messaoudi <i>et al.</i> , 2010; Chung <i>et al.</i> , 2014; Butler <i>et al.</i> , 2020)                                                                                                                                                                                             |
|                             |                                                                                                                                                      | Biologic markers           | Pittsburgh sleep quality index        | (Nishida <i>et al.</i> , 2017; Butler <i>et al.</i> , 2020)                                                                                                                                                                                                                                                                                         |
|                             |                                                                                                                                                      |                            | Mini-mental state examination         | (Akbari <i>et al.</i> , 2016; Ton <i>et al.</i> , 2020; Reid, Ryu, Kim, & Jeon, 2018)                                                                                                                                                                                                                                                               |
|                             |                                                                                                                                                      |                            | Cortisol levels                       | (Andersson <i>et al.</i> , 2016; Kato-Kataoka <i>et al.</i> , 2016; Takada <i>et al.</i> , 2016; Nishida <i>et al.</i> , 2017; Messaoudi <i>et al.</i> , 2010; Nishihira <i>et al.</i> , 2014; Mohammadi <i>et al.</i> , 2015)                                                                                                                      |
|                             |                                                                                                                                                      |                            | Tryptophan blood levels               | (Kato-Kataoka <i>et al.</i> , 2016; Kazemi, Noorbala, Azam, Eskandari, & Djafarian, 2018; Mohammadi <i>et al.</i> , 2015)                                                                                                                                                                                                                           |
| Inflammation markers levels | (Majeed, Nagabhushanam, Arumugam, Majeed, & Ali, 2018; Pinto-Sanchez <i>et al.</i> , 2017; Nishihira <i>et al.</i> , 2014; Ton <i>et al.</i> , 2020) |                            |                                       |                                                                                                                                                                                                                                                                                                                                                     |
| Oxidative stress markers    | (Akkasheh <i>et al.</i> , 2016; Kouchaki <i>et al.</i> , 2017; Akbari <i>et al.</i> , 2016; Ton <i>et al.</i> , 2020; Reid, Ryu, Kim, & Jeon, 2018)  |                            |                                       |                                                                                                                                                                                                                                                                                                                                                     |

|         |                         |                                                                         |
|---------|-------------------------|-------------------------------------------------------------------------|
| Imaging | Neurotransmitter levels | (Pinto-Sanchez <i>et al.</i> , 2017; Kato-Kataoka <i>et al.</i> , 2016) |
|         | MRI                     | (Pinto-Sanchez <i>et al.</i> , 2017; Tillisch <i>et al.</i> , 2013)     |
|         | Encephalogram           | (Allen <i>et al.</i> , 2016)                                            |

---

\*Detailed information regarding references is shown in the main manuscript. MRI: Magnetic Resonance Imaging.
